# Supplementary material for: Relationship Between Head Trauma History and Motor Subtype in Early Parkinson’s Disease
Source: MDPI journal article supplement (doi:10.3390/medicina62061058), 2026-05-30
Supplement: s1 [file medicina-4263526-supplementary.pdf › medicina-4263526-supplementary.pdf]

**Supplementary Table S1.** Pre-specified sensitivity analyses for the head trauma–motor subtype association.

| Sensitivity scenario                         | HT (n)    | No HT (n)  | $\chi^2$ p-value |
|----------------------------------------------|-----------|------------|------------------|
| <b>Primary analysis (full cohort)</b>        | <b>35</b> | <b>202</b> | <b>0.010</b>     |
| (i) Disease duration $\geq 6$ months         | 21        | 151        | 0.013            |
| (ii) Major HT only (LOC-positive)            | 17        | 202        | 0.101            |
| (iii) Jankovic-style subtype classification  | 35        | 202        | 0.040            |
| (iv) HT timing $\geq 1$ year before PD onset | 32        | 202        | 0.017            |
| HT timing $\geq 5$ years before PD onset     | 26        | 202        | 0.053            |
| HT timing $\geq 10$ years before PD onset    | 21        | 202        | 0.134            |

All p-values are from Fisher's exact test of the HT  $\times$  motor-subtype contingency table (3 categories: tremor-dominant, mixed, akinetic-rigid; or, for sensitivity (iii), tremor-dominant, indeterminate, postural instability/gait difficulty). Bold indicates the primary analysis. HT, head trauma; LOC, loss of consciousness; PD, Parkinson's disease.
